# Supplementary material
Source: PubMed Central journal article supplement (PMC3251312)
Supplement: NIHMS61873-supplement-si20061212_053.pdf [file NIHMS61873-supplement-si20061212_053.pdf]

Supporting Information for:

Synthesis of Novel Symmetrical and Unsymmetrical Pyrazines

*Douglass F. Taber\**, *Peter W. DeMatteo*, and *Karen V. Taluskie*

Department of Chemistry and Biochemistry, University of Delaware, Newark, DE 19716.

\*taberdf@udel.edu

Table of Contents:

|                                                      |     |                                                      |     |
|------------------------------------------------------|-----|------------------------------------------------------|-----|
| General Experimental Section:.....                   | S2  | Amino Diol <b>3e</b> : <sup>13</sup> C Spectrum..... | S18 |
| Experimental Procedures:.....                        | S3  | Pyrazine <b>4a</b> : <sup>1</sup> H Spectrum.....    | S19 |
| Amino Diol <b>3a</b> : <sup>1</sup> H Spectrum.....  | S9  | Pyrazine <b>4a</b> : <sup>13</sup> C Spectrum.....   | S20 |
| Amino Diol <b>3a</b> : <sup>13</sup> C Spectrum..... | S10 | Pyrazine <b>4b</b> : <sup>1</sup> H Spectrum.....    | S21 |
| Amino Diol <b>3b</b> : <sup>1</sup> H Spectrum.....  | S11 | Pyrazine <b>4b</b> : <sup>13</sup> C Spectrum .....  | S22 |
| Amino Diol <b>3b</b> : <sup>13</sup> C Spectrum..... | S12 | Pyrazine <b>4c</b> : <sup>1</sup> H Spectrum.....    | S23 |
| Amino Diol <b>3c</b> : <sup>1</sup> H Spectrum.....  | S13 | Pyrazine <b>4c</b> : <sup>13</sup> C Spectrum .....  | S24 |
| Amino Diol <b>3c</b> : <sup>13</sup> C Spectrum..... | S14 | Pyrazine <b>4d</b> : <sup>1</sup> H Spectrum.....    | S25 |
| Amino Diol <b>3d</b> : <sup>1</sup> H Spectrum.....  | S15 | Pyrazine <b>4d</b> : <sup>13</sup> C Spectrum .....  | S26 |
| Amino Diol <b>3d</b> : <sup>13</sup> C Spectrum..... | S16 | Pyrazine <b>4e</b> : <sup>1</sup> H Spectrum.....    | S27 |
| Amino Diol <b>3e</b> : <sup>1</sup> H Spectrum.....  | S17 | Pyrazine <b>4e</b> : <sup>13</sup> C Spectrum .....  | S28 |

#### General Experimental Section:

$^1\text{H}$  NMR and  $^{13}\text{C}$  NMR spectra were obtained as solutions in the deuterated solvents specified at 400 MHz and 100 MHz respectively.  $^{13}\text{C}$  multiplicities were determined with the aid of a JVERT pulse sequence, differentiating the signals for methyl and methane carbons as 'd', from methylene and quaternary carbons as 'u'. The infrared (IR) spectra were determined as films or nujol mulls.  $R_f$  values indicated refer to thin layer chromatography (TLC) on 2.5 x 10 cm, 250  $\mu\text{m}$  silica gel plates. Column chromatography was carried out as indicated on either silica gel or basic alumina. The solvent mixtures reported are volume/volume mixtures. All glassware was oven dried. All reactions were stirred magnetically, under dry  $\text{N}_2$ , unless otherwise noted.

### Experimental Procedures:

Amino diols **3a**: In a 25 mL round bottom flask, *S*-(-)-2-amino-3-phenyl-1-propanol (**2a**) (1.1 g, 13 mmol) was combined with cyclohexene oxide (**1a**) (1.47 g, 15 mmol). The flask was sealed and the reaction was allowed to proceed for 2 weeks, at which point the mixture was subjected to bulb-to-bulb distillation (pot = 100 °C, 2 mmHg) to remove unreacted amino alcohol and epoxide, followed by column chromatography of the residue (acetone/ CH<sub>2</sub>Cl<sub>2</sub>/NH<sub>4</sub>OH) over basic alumina to give the diastereomeric amino diols **3a** (1.1 g, 34% yield) as a viscous, pale yellow oil. TLC:  $R_f = 0.59$  (5:44:1 MeOH/CH<sub>2</sub>Cl<sub>2</sub>/NH<sub>4</sub>OH). IR (film) 3352, 2930, 2861, and 1454 cm<sup>-1</sup>; <sup>1</sup>H NMR (CD<sub>3</sub>OD)  $\delta$  0.78-1.01 (m, 1H), 1.15 (m, 3H), 1.55 (m, 2H), 1.80 (m, 2H), 2.24-2.36 (m, 1H), 2.57-2.74 (m, 1H), 2.832 (m, 1H), 3.11 (m, 1H), 3.22-3.43 (m, 1H), and 7.13 (m, 5H); <sup>13</sup>C NMR (CD<sub>3</sub>OD)  $\delta$  d 40.40, 58.82, 59.48, 74.67, 75.17, 127.20, 127.32, 129.43, 129.45, 129.59, 130.38, 130.46; u 25.59, 25.76, 31.61, 31.82, 35.07, 35.11, 37.81, 39.69; HRMS calcd for C<sub>15</sub>H<sub>23</sub>NNaO<sub>2</sub>: 272.163, obsd: 272.163 [M+Na].

Amino diols **3c**: Trans-anethole oxide (**1b**) (2.7 g, 16.4 mmol) was combined neat with *R*-2-amino-1-butanol (**2b**) (1.5 g, 16.4 mmol). After a week of stirring under nitrogen at room temperature, the reaction mixture was diluted with 20 mL of methanol and evaporated onto 6 g of basic alumina. An alumina column was then run with a 0-40% acetone/ CH<sub>2</sub>Cl<sub>2</sub>/NH<sub>4</sub>OH gradient. The eluted fractions still had traces of amino alcohol, therefore the residue after evaporation was then subjected to bulb-to-bulb distillation (2 mm Hg, Pot = 115 °C, pot residue) to give the amino diols **3c** (1.5 g, 36% yield). TLC:  $R_f = 0.41$ , (5:44:1 MeOH/CH<sub>2</sub>Cl<sub>2</sub>/NH<sub>4</sub>OH); IR (film): 3386, 2965, 1512, and 1248 cm<sup>-1</sup>; <sup>1</sup>H NMR (CD<sub>3</sub>OD)  $\delta$  0.82 (t,  $J = 7.4$  Hz, 1H), 0.88 (t,  $J = 7.6$  Hz, 1H), 1.01

(t,  $J = 6$  Hz, 3H), 1.25-1.45 (m, 1H), 1.45-1.65 (m, 1H), 1.89 (m, 1H), 2.39 (m, 1H), 3.30-3.60 (m, 2H), 3.65-3.75 (m, 2H), 4.00 (m, 1H), 6.90 (m, 2H), 7.25 (m, 2H);  $^{13}\text{C}$  NMR ( $\text{CD}_3\text{OD}$ )  $\delta$  d 8.88, 9.59, 18.12, 18.62, 54.24, 56.61, 57.27, 63.70, 64.61, 69.84, 113.03, 129.41, 129.61; u 22.13, 24.66, 25.11, 67.47, 130.99, 131.96, 158.94; HRMS calcd for  $\text{C}_{14}\text{H}_{23}\text{NNaO}_3$ : 276.158, obsd: 276.158 [M+Na].

Amino diols **3d**: Trans-anethole oxide (**1b**) (2.7 g, 16.4 mmol) and *S*-(-)-2-amino-3-phenyl-1-propanol (**2a**) (2.5g, 16.4 mmol) were combined with 5 mL MeOH and the solution was stirred for two weeks at room temperature under nitrogen. The reaction mixture was then taken directly to bulb-to-bulb distillation (2 mm Hg, pot = 100 °C, bottom fraction) and the residue was passed through a short alumina column (acetone/ $\text{CH}_2\text{Cl}_2/\text{NH}_4\text{OH}$ ) to give the amino diols **3d** (1.37 g, 30% yield).

TLC:  $R_f = 0.54$ , (5:44:1 MeOH/ $\text{CH}_2\text{Cl}_2/\text{NH}_4\text{OH}$ ); IR (film): 3385, 2931, 1512, and 1248  $\text{cm}^{-1}$ ;  $^1\text{H}$  NMR ( $\text{CDCl}_3$ )  $\delta$  0.9-1.0 (m, 4H), 1.2 (s, 1H), 2.4-3.0 (m, 3H), 3.0-4.0 (m, 4H), 6.7-7.4 (m, 11H).  $^{13}\text{C}$  NMR ( $\text{CDCl}_3$ )  $\delta$  d 19.12, 29.19, 30.88, 55.21, 56.77, 57.54, 64.21, 64.74, 70.12, 70.21, 113.64, 113.84, 126.27, 126.42, 126.57, 128.42, 128.50, 128.57, 128.60, 128.81, 128.94, 129.19, 129.24, 129.33, 129.41; u 30.51, 37.69, 38.86, 39.55, 53.43, 53.81, 62.04, 63.89, 64.21, 131.19, 131.48, 158.78, 159.01; HRMS calcd for  $\text{C}_{19}\text{H}_{26}\text{N}_1\text{O}_3$ : 316.191, obsd: 316.192 [M+H].

Amino diol **3e**: Following the procedure of Taguchi,<sup>8</sup> cyclohexene oxide (**1a**) (10 g, 0.10 mol) and 6.0 ml conc.  $\text{NH}_4\text{OH}$  (29% aq.) were combined. The flask was sealed and the reaction was allowed to stir for 5 days. The white slurry was then vacuum filtered with 3 x 25 mL rinses of  $\text{Et}_2\text{O}$  and evaporated to give amino diols **3e** (3.1 g, 29% purified yield). TLC:  $R_f = 0.28$  (5:44:1 MeOH/ $\text{CH}_2\text{Cl}_2/\text{NH}_4\text{OH}$ ). MP: 150-151 °C (Lit = 153 °C); IR

(film) 3336, 2929, 2855, 1449  $\text{cm}^{-1}$ ;  $^1\text{H}$  NMR ( $\text{CDCl}_3$ )  $\delta$  0.90-1.05 (m, 1H), 1.15-1.35 (m, 3H), 1.65-1.80 (m, 2H), 1.95-2.10 (m, 2H), 2.30-2.40 (m, 1H), 3.15-3.25 (m, 1H).  $^{13}\text{C}$  NMR ( $\text{CDCl}_3$ )  $\delta$  d 59.28, 74.11; u 24.49, 24.92, 31.20, 33.88; HRMS calcd for  $\text{C}_{12}\text{H}_{23}\text{NNaO}_2$ : 236.163, obsd: 236.163 [M+Na].

**Pyrazine 4a:** Oxalyl chloride (2.13 g, 14.0 mmol) diluted to 10 mL with  $\text{CH}_2\text{Cl}_2$  was added to a 100 mL round bottom flask in a  $-40^\circ\text{C}$  bath. DMSO (1.31 g, 16.9 mmol diluted to 10 mL with  $\text{CH}_2\text{Cl}_2$ ) over the course of one minute with gas evolution. Amino diols **3a** (250 mg, 0.92 mmol in 10 mL  $\text{CH}_2\text{Cl}_2$ ) were then added. The reaction was allowed to proceed with the temperature being kept between  $-20^\circ\text{C}$  and  $-40^\circ\text{C}$ . After 2h, triethylamine (5 mL, 35.8 mmol) was then added with accompanying exotherm to give a turbid yellow solution. The mixture was allowed to warm to  $0^\circ\text{C}$  over the course of 30 min, and the mixture was then partitioned between water and  $\text{CH}_2\text{Cl}_2$ . The combined organic extract was dried over  $\text{Na}_2\text{SO}_4$ . TLC indicated the absence of amino diols **3a**. The  $\text{CH}_2\text{Cl}_2$  solution was decanted into a 250 mL round bottom flask, to which was added 20 mL of absolute EtOH and  $\text{NH}_2\text{OH} \cdot \text{HCl}$  (88 mg, 1.27 mmol). The round bottom flask was fitted with a distillation apparatus and the mixture was heated until the bulk of the  $\text{CH}_2\text{Cl}_2$  had distilled out. The mixture was then kept at reflux for two hours with an air condenser. The brown solution was then concentrated onto flash silica gel and chromatographed on flash silica gel with a MTBE/PE gradient to give 88 mg of crude pyrazine **4a**. This was then further purified via TLC mesh chromatography (1:1 MTBE/PE) to give 48 mg of pyrazine **4a** as a pale yellow oil, 23% yield overall from **3a**.

**Pyrazine 4c:** Oxalyl chloride (2.13 g, 14.0 mmol) diluted to 10 mL with  $\text{CH}_2\text{Cl}_2$  was added to a 100 mL round bottom flask in a  $-40^\circ\text{C}$  bath. DMSO (1.31 g, 16.9 mmol

diluted to 10 mL with CH<sub>2</sub>Cl<sub>2</sub>) over the course of one minute with gas evolution. Amino diols **3c** (250 mg, 0.99 mmol) in 10 mL CH<sub>2</sub>Cl<sub>2</sub> were then added. The reaction was allowed to proceed with the temperature being kept between -20 °C and -40 °C. After 2h, triethylamine (5mL, 35.8 mmol) was then added with accompanying exotherm to give a turbid yellow solution. The mixture was allowed to warm to 0 °C over the course of 30 min, and the mixture was then partitioned between water and CH<sub>2</sub>Cl<sub>2</sub>. The combined organic extract was dried over Na<sub>2</sub>SO<sub>4</sub>. TLC indicated the absence of amino diols **3c**. The CH<sub>2</sub>Cl<sub>2</sub> solution was decanted into a 250 mL round bottom flask, to which was added 20 mL of absolute EtOH and NH<sub>2</sub>OH · HCl (88 mg, 1.27 mmol). The round bottom flask was fitted with a distillation apparatus and the mixture was heated until the bulk of the CH<sub>2</sub>Cl<sub>2</sub> had distilled out. The mixture was then kept at reflux for two hours with an air condenser. The brown solution was then concentrated onto flash silica gel and chromatographed on flash silica gel with a MTBE/PE gradient to give crude pyrazine **4c**. This was then further purified via TLC mesh chromatography (1:1 MTBE/PE) to give 25 mg of pyrazine **4c** as a, 20% yield overall from **3c**. TLC: *R<sub>f</sub>* = 0.50, (MTBE); IR (film): 2970, 1610, 1514, 1382, and 1250 cm<sup>-1</sup>; <sup>1</sup>H NMR (CDCl<sub>3</sub>) δ 1.33 (t, *J* = 13.2 Hz, 3H), 2.59 (s, 3H), 2.82 (q, *J* = 7.6, 13.2 Hz, 2H), 3.85 (s, 3H), 6.98 (d, *J* = 9.6 Hz, 2H), 7.51 (d, *J* = 9.6 Hz, 2H), 8.26 (s, 1H); <sup>13</sup>C NMR (CDCl<sub>3</sub>) δ d 13.77, 22.84, 55.38, 113.82, 130.41, 140.51; u 28.36, 131.44, 148.23, 152.39, 155.18, 159.91; HRMS calcd for C<sub>14</sub>H<sub>17</sub>N<sub>2</sub>O: 229.134, obsd: 229.133 [M+H].

Pyrazine **4d**: Oxalyl chloride (2.13 g, 14.0 mmol diluted to 10 mL with CH<sub>2</sub>Cl<sub>2</sub>) was added to a 100 mL round bottom flask in a -40 °C bath. DMSO (1.31 g, 16.9 mmol diluted to 10 mL with CH<sub>2</sub>Cl<sub>2</sub>) over the course of one minute with gas evolution. Amino

diols **3d** (315 mg, 1.0 mmol in 10 mL CH<sub>2</sub>Cl<sub>2</sub>) were then added. The reaction was allowed to proceed with the temperature being kept between -20 °C and -40 °C. After 2h, triethylamine (5 mL, 35.8 mmol) was then added with accompanying exotherm to give a turbid yellow solution. The mixture was allowed to warm to 0 °C over the course of 30 min, and the mixture was then partitioned between water and CH<sub>2</sub>Cl<sub>2</sub>. The combined organic extract was dried over Na<sub>2</sub>SO<sub>4</sub>. TLC indicated the absence of amino diols **3d**. The CH<sub>2</sub>Cl<sub>2</sub> solution was decanted into a 250 mL round bottom flask, to which was added 20 mL of absolute EtOH and NH<sub>2</sub>OH · HCl (88 mg, 1.27 mmol). The round bottom flask was fitted with a distillation apparatus and the mixture was heated until the bulk of the CH<sub>2</sub>Cl<sub>2</sub> had distilled out. The mixture was then kept at reflux for two hours with an air condenser. The brown solution was then concentrated onto flash silica gel and chromatographed on flash silica gel with a MTBE/PE gradient to give crude pyrazine **4d**. This was then further purified via TLC mesh chromatography (1:1 MTBE/PE) to give 25 mg of pyrazine **4d** as a pale yellow oil, 15% yield overall from **3d**.

TLC:  $R_f$  = 0.52, (MTBE); IR (film): 2920, 2360, 1514, and 1251 cm<sup>-1</sup>; <sup>1</sup>H NMR (CDCl<sub>3</sub>) δ 1.02 (s, 3H), 1.49 (s, 2H), 2.42 (s, 3H), 3.04 (s, 1H), 3.69 (s, 3H), 4.01 (s, 2H), 6.83 (d,  $J$  = 6.4 Hz, 2H), 7.00-7.20 (m, 5H), 7.37 (d,  $J$  = 6.8 Hz, 2H), 8.07 (s, 1H); <sup>13</sup>C NMR (CDCl<sub>3</sub>) δ d 22.70, 26.80, 55.20, 113.64, 126.40, 128.48, 128.84, 130.30, 141.07; u 41.51, 131.02, 138.53, 148.44, 152.54, 159.81; HRMS calcd for C<sub>19</sub>H<sub>18</sub>N<sub>2</sub>NaO: 313.132, obsd: 313.133[M+Na].

Pyrazine **4e**:

Amino diol **3e** (213 mg, 1.0 mmol) was suspended in 20 mL CH<sub>2</sub>Cl<sub>2</sub>, then DMSO was added dropwise until complete dissolution was observed (~5 drops). Meanwhile, 6.3 mL

of a 1.63 M oxalyl chloride/ CH<sub>2</sub>Cl<sub>2</sub> solution was cooled to -78 °C. DMSO (1.2 mL diluted to 10 mL with CH<sub>2</sub>Cl<sub>2</sub>) was added dropwise over 5 min with stirring. The solution of amino diol **3e** was then added over 5 min, and the reaction was kept at -78 °C for an additional 2 h. Triethylamine (5 mL) was then added, and after 15 min the reaction was allowed to come to room temperature (~2 h). The mixture was then partitioned between water and CH<sub>2</sub>Cl<sub>2</sub>. The organic extract was dried over Na<sub>2</sub>SO<sub>4</sub> then decanted into another flask, to which was added 20 mL abs EtOH and NH<sub>2</sub>OH · HCl (78 mg, 1.12 mmol). The mixture then had 95 mL solvent distilled out of it by fractional distillation and was refluxed at 90 °C (bath temp) for an additional 2 h. The mixture was then concentrated and the residue was chromatographed to give pyrazine **4e** as a white solid (80 mg, 43% yield from amino diol **7**). MP: 103-104 °C. Lit = 105-106 °C.<sup>12</sup> TLC: *R<sub>f</sub>* = 0.62, (MTBE); <sup>1</sup>H NMR (CDCl<sub>3</sub>) δ 1.90 (m, 2H), 2.85 (m, 2H); <sup>13</sup>C NMR (CDCl<sub>3</sub>) δ u 22.98, 32.02, 149.33; HRMS calcd for C<sub>12</sub>H<sub>16</sub>N<sub>2</sub>: 188.131, obsd: 188.131 [M+].



Amino Diols 3a: <sup>1</sup>H Spectrum

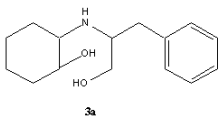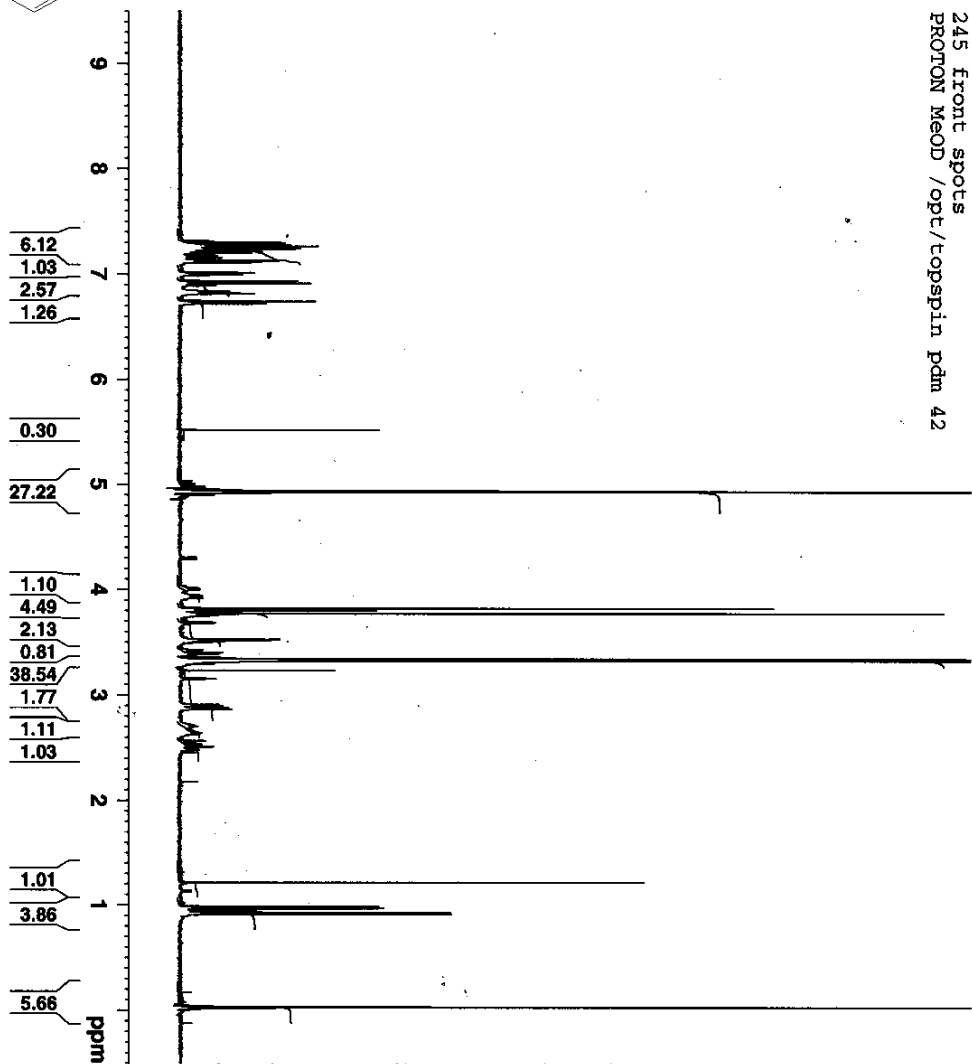

245 front spots  
 PROTON MeOD /opt/topspin pdm 42

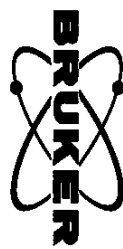

Current Data Parameters  
 NAME Pd245F  
 EXPNO 1  
 PROCNO 1

F2 - Acquisition Parameters  
 Date\_ 20051122  
 Time 11.55  
 INSTRUM spect  
 PROBHD 5 mm PABBO BB-  
 PULPROG zg30  
 TD 65536  
 SOLVENT MeOD  
 NS 15  
 DS 2  
 SWH 4006.410 Hz  
 FWHZ 0.061133 Hz  
 AQ 8.1789427 sec  
 RG 287.4  
 DM 124.800 usec  
 DE 6.00 usec  
 TE 300.0 K  
 D1 1.00000000 sec  
 TDO 1

==== CHANNEL f1 =====  
 NUCL1 1H  
 P1 10.25 usec  
 PL1 -2.00 dB  
 SFO1 400.1318006 MHz

F2 - Processing parameters  
 SI 32768  
 SF 400.1300000 MHz  
 WDM 0  
 SSB 0  
 LB 0.30 Hz  
 GB 0  
 PC 1.00

# Amino Diols 3a: <sup>13</sup>C Spectrum

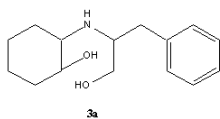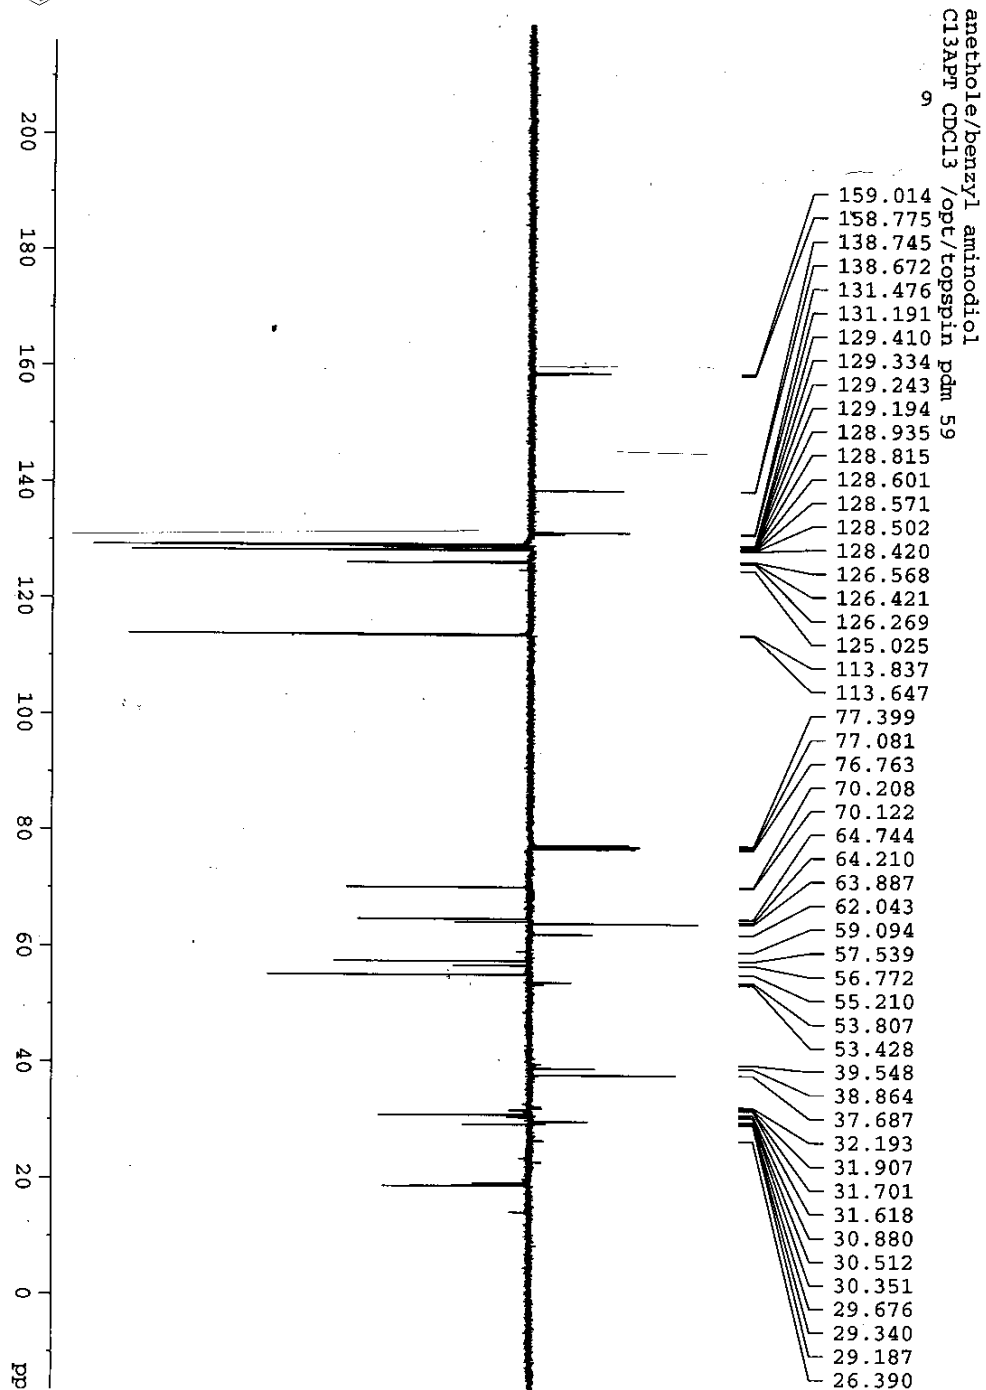



Amino Diols **3b**: <sup>13</sup>C Spectrum

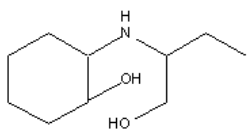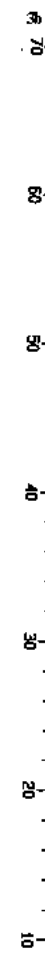

```

Current Data Parameters
NAME      pediol1
EXPNO    2
PROCNO   1

F2 - Acquisition Parameters
Date_    20051205
Time     10.32
INSTRUM  spect
PROBHD   5 mm DPX 5H
PULPROG  jvpt1
TD       65536
SOLVENT  DMS-D6
NS       246
DS       4
SWH       27173.912 Hz
FIDRES   0.414641 Hz
AQ       1.2269124 sec
RG       2048
SQ       18.400 usec
DE       4.50 usec
TE       300.0 K
D1       6.00000000 sec
D11      0.03000000 sec
D13      0.00000300 sec
D20      0.00700000 sec

----- CHANNEL f1 -----
NUC1     13C
P1       13.00 usec
P2       56.00 usec
PL1      0.00 dB
PL2      0.00 dB
SFO1     100.6262995 MHz

----- CHANNEL f2 -----
NUC2     1H
RGPR2    96.00 usec
R12      120.00 dB
PL12     17.00 dB
SFO2     400.1420007 MHz

F2 - Processing parameters
SI       32768
SF       100.6182590 MHz
WDW      EM
SSB      0
LB       1.00 Hz
GB       0
PC       1.00

1D NMR plot parameters
CX       20.00 cm
FAP      78.402 cm
F1       7898.18 Hz
F2P      5.4390 ppm
F2       572.65 Hz
F2CN     3.58570 ppm/cm
HZCM     369.79715 Hz/cm
    
```

Amino Diols 3c: <sup>1</sup>H Spectrum

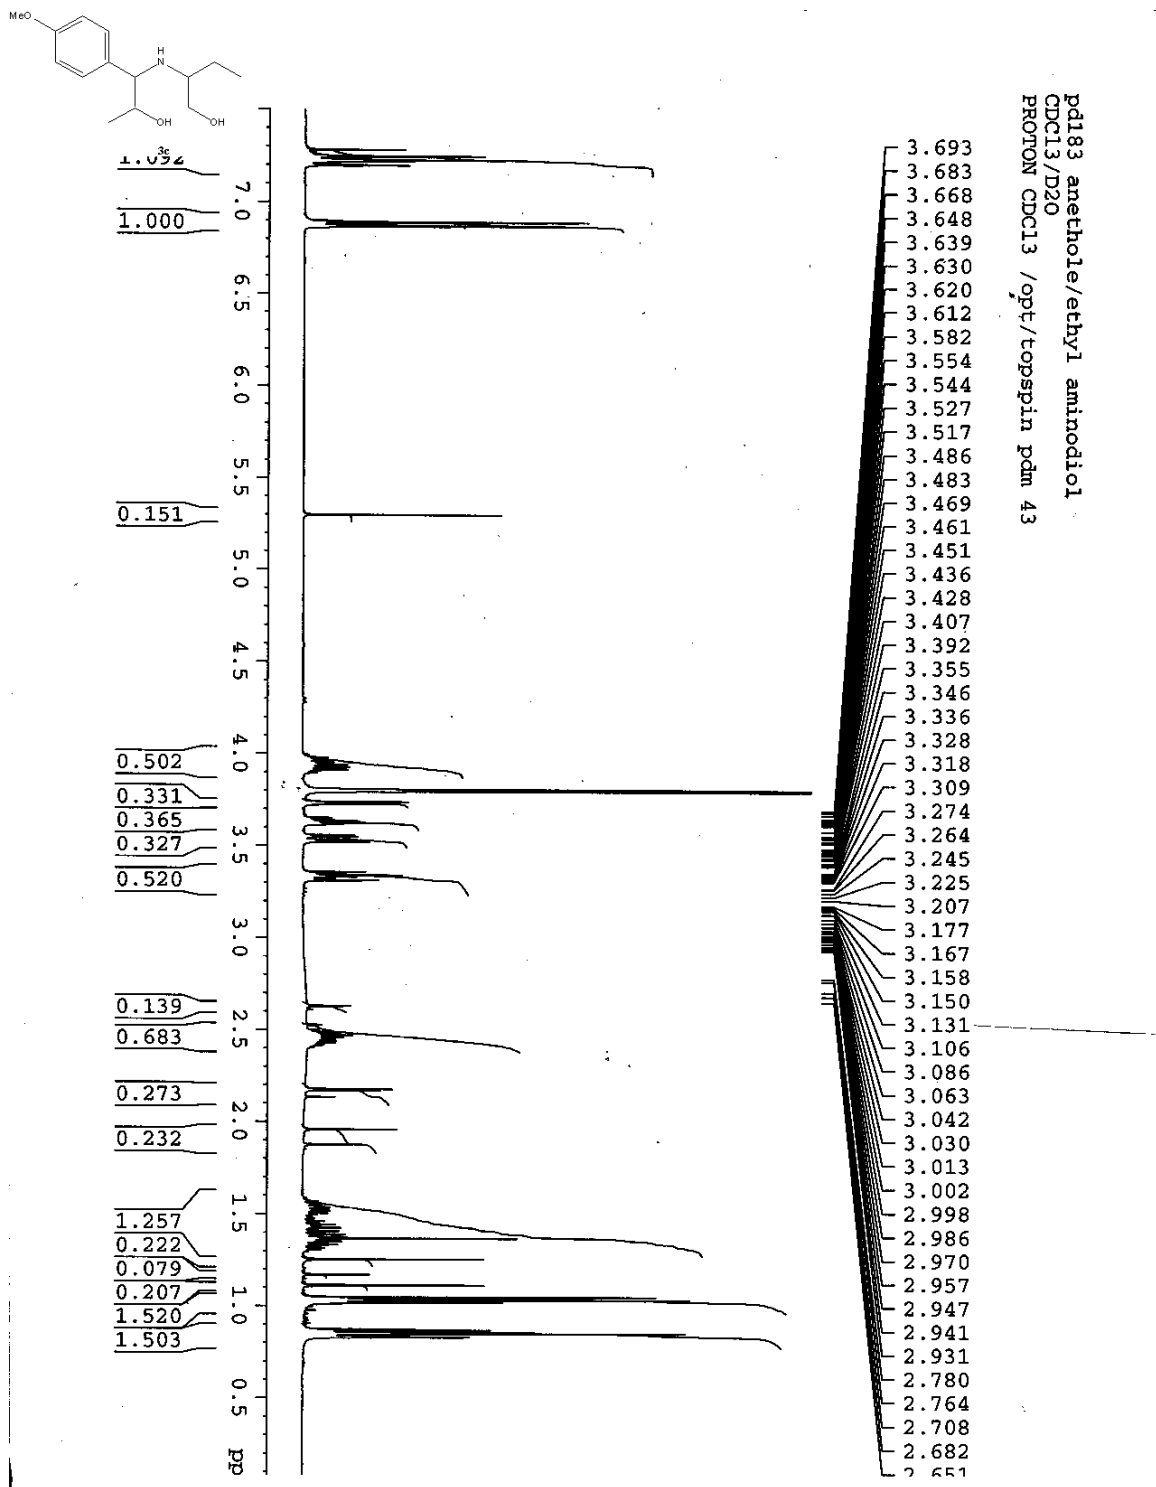

# Amino Diols 3c: <sup>13</sup>C Spectrum

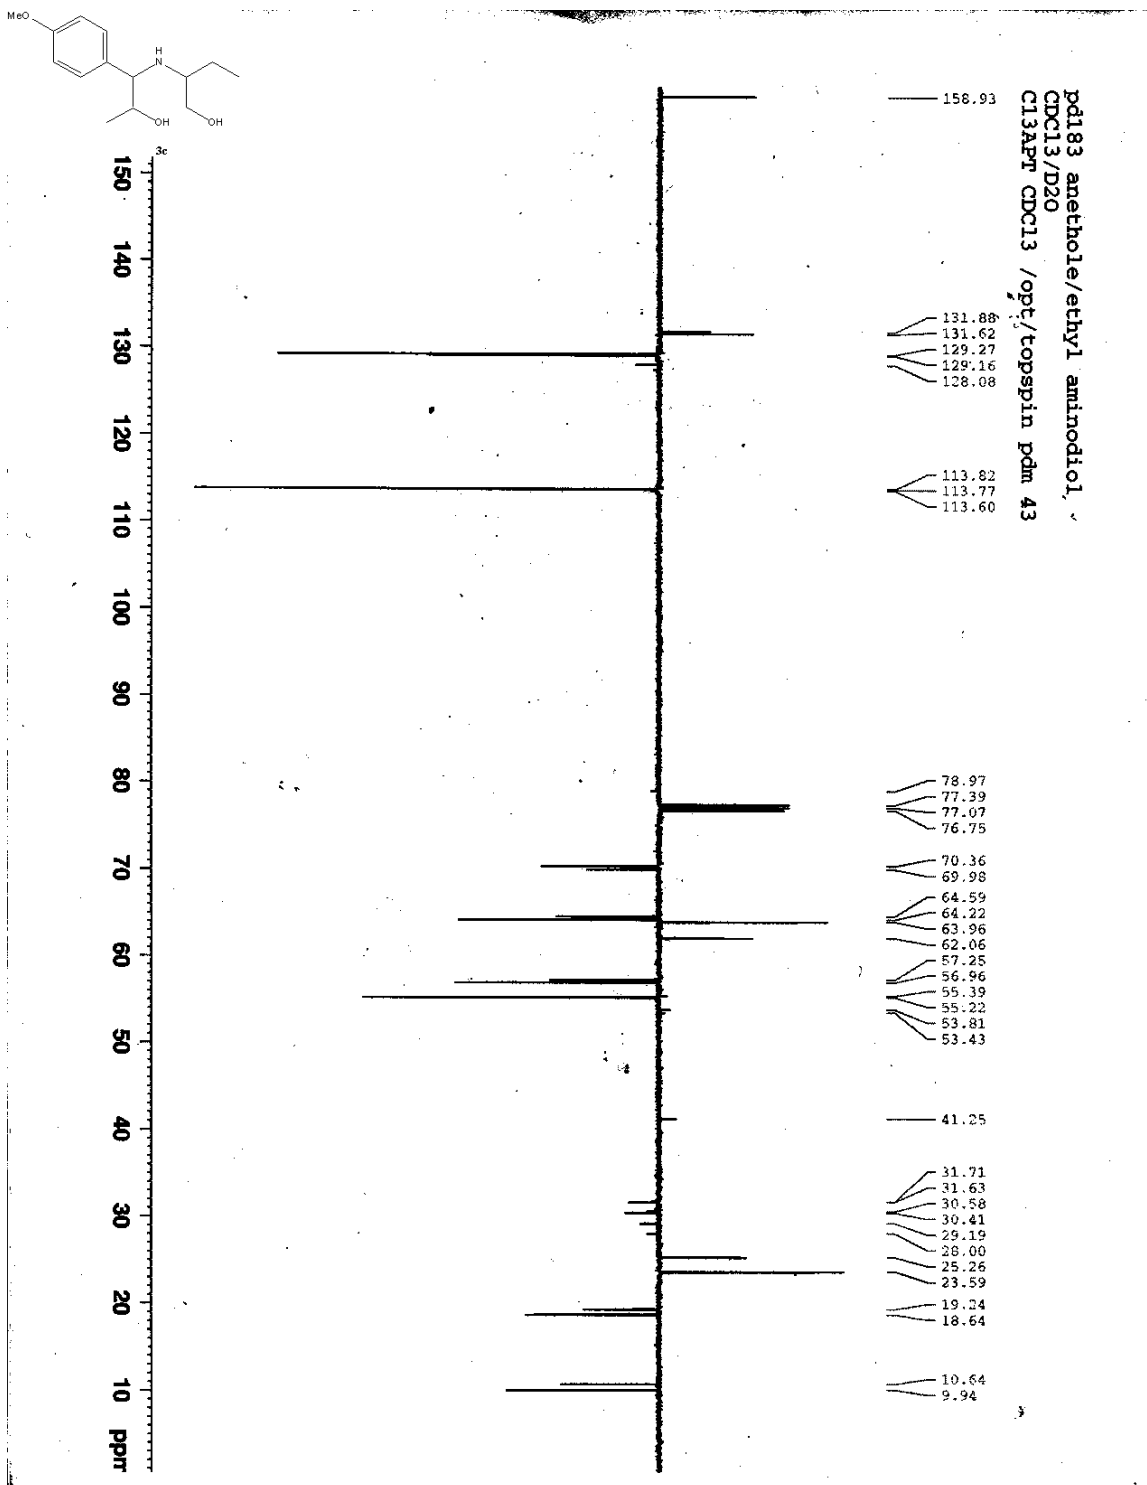

Amino Diols **3d**: <sup>1</sup>H Spectrum

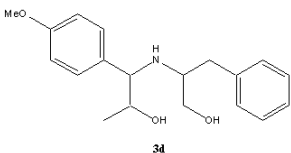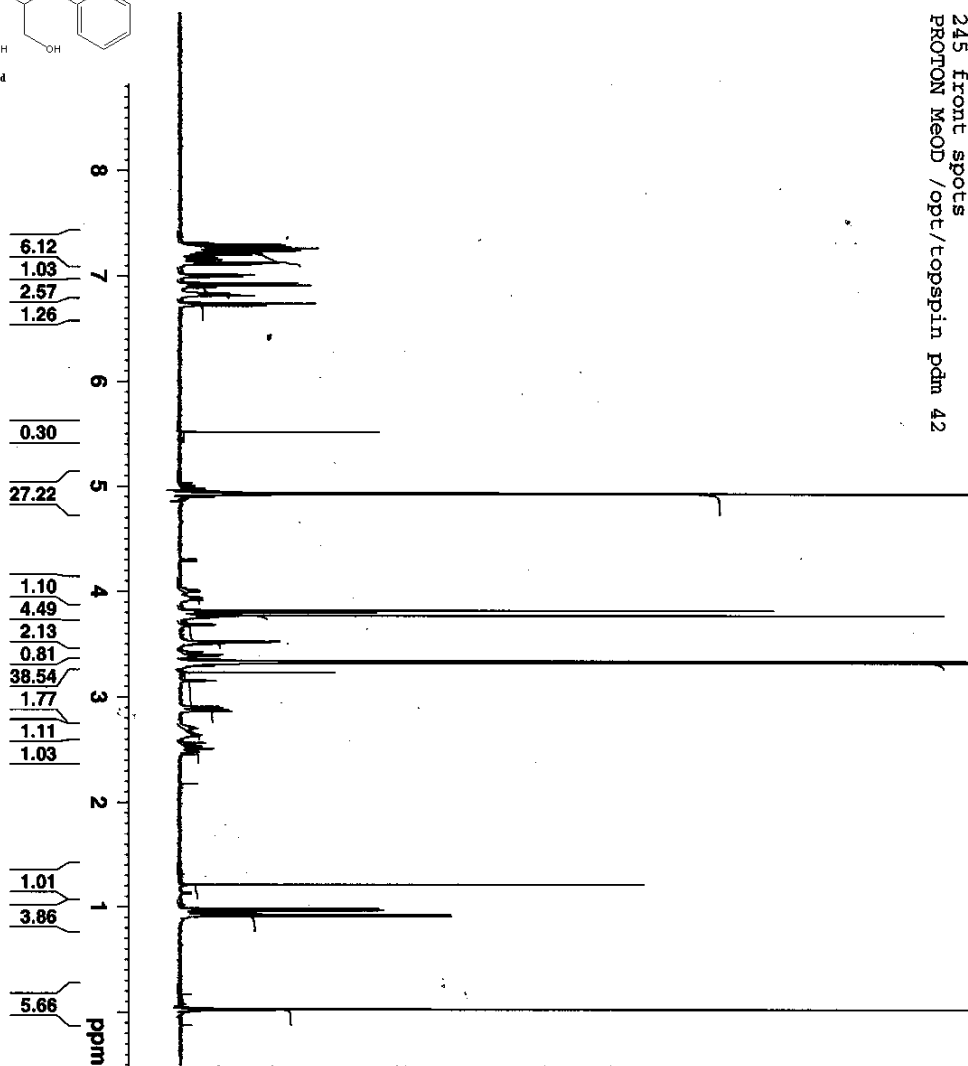

245 front spots  
PROTON MeOD /opt/topspin pdm 42

```

Current Data Parameters
NAME          pd245f
EXPNO         1
PROCNO        1

F2 - Acquisition Parameters
Date_         20051122
Time          11.55
INSTRUM       spect
PROBHD        5 mm PABBO BB-
PULPROG       zg30
TD            65536
SOLVENT       MeOD
NS            15
DS            2
SWH           4006.410 Hz
FIDRES        0.061133 Hz
AQ            8.1789427 sec
RG            287.4
DM            124.800 usec
DE            6.00 usec
TE            300.0 K
D1            1.00000000 sec
TD0           1

===== CHANNEL f1 =====
NUC1           1H
P1            10.25 usec
PL            -2.00 dB
SFO1          400.1318006 MHz

F2 - Processing parameters
SI            32768
SF            400.1300000 MHz
WDW           EM
SSB           0
LB            0.30 Hz
GB            0
PC            1.00
    
```

# Amino Diols **3d**: $^{13}\text{C}$ Spectrum

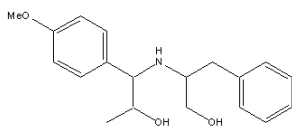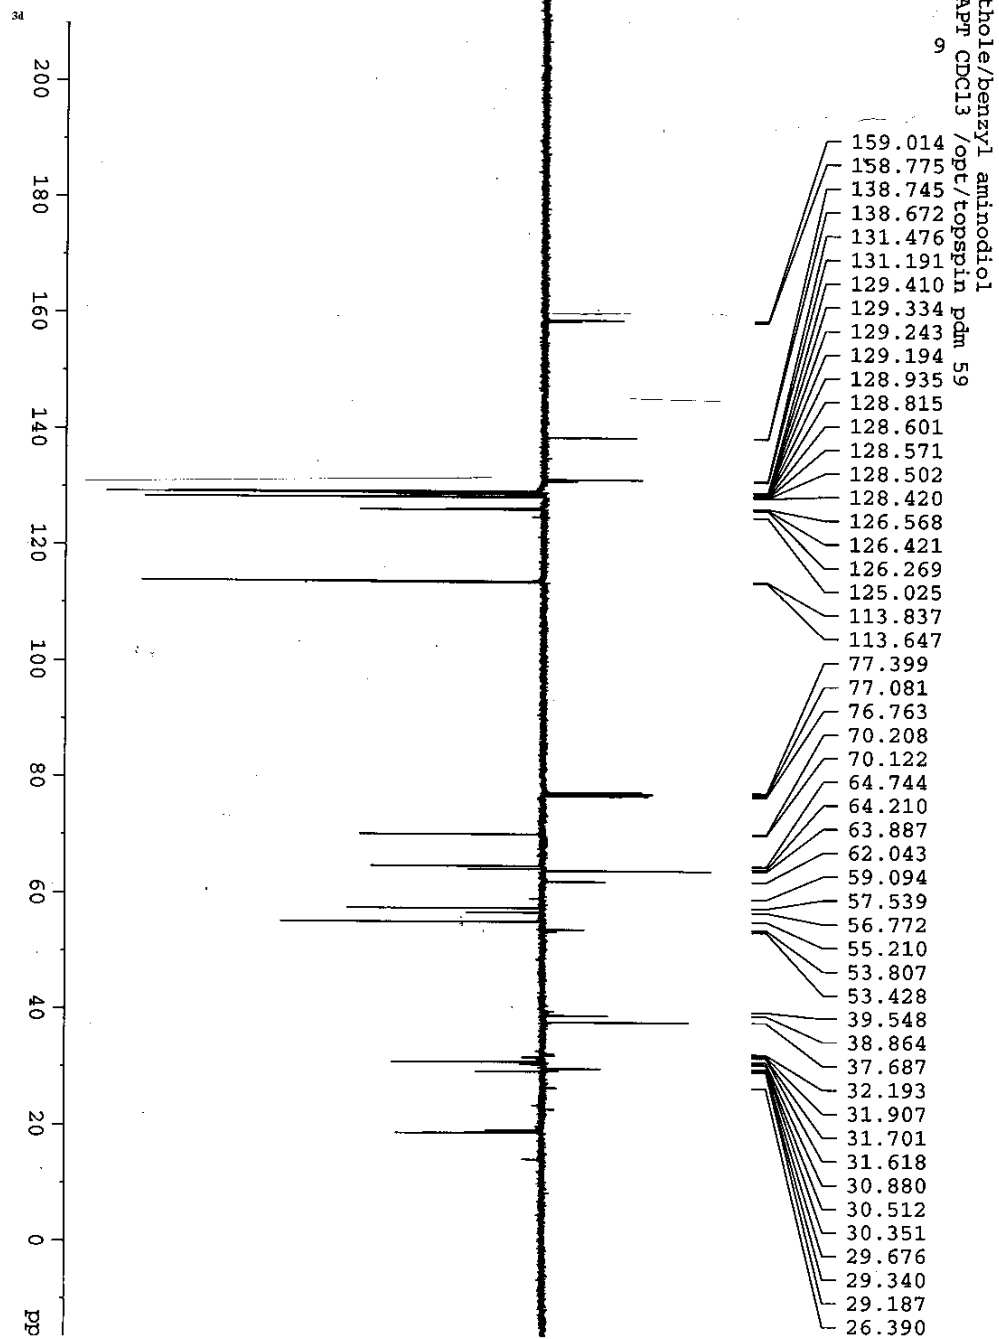





Amino Diol **3e**:  $^{13}\text{C}$  Spectrum

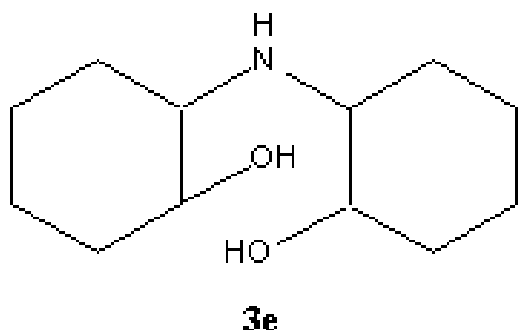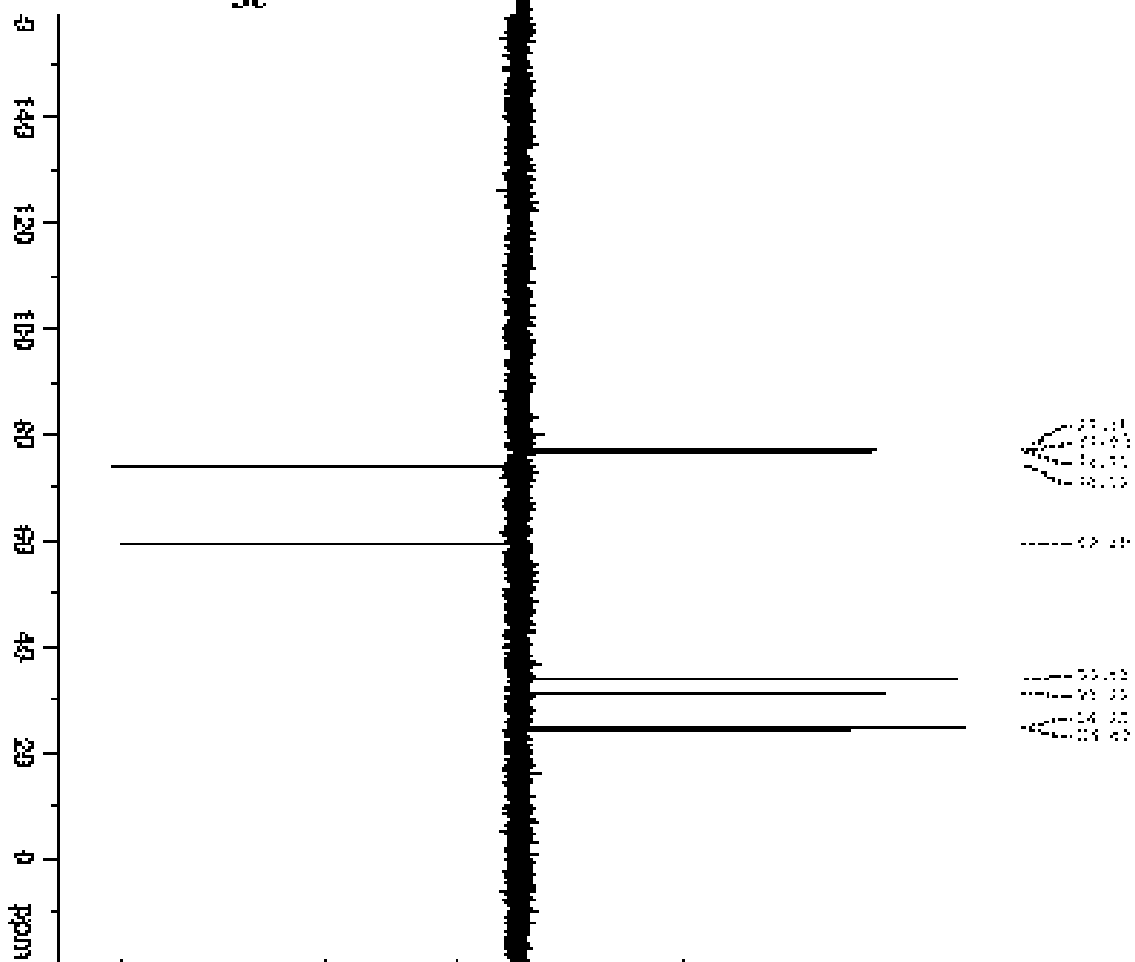

**BRUMER**

National Super Magnetron  
 NAME: 3e  
 EXPNO: 2  
 PROCNO: 1

US - Acquisition Parameters  
 Date\_ : 201203  
 Time : 14:22  
 INSTRUM : spect  
 POWER : 4.00W  
 PULPROG : zgpg30  
 PROCNO : 200  
 LG : 65532  
 SOLVENT : DMSO  
 NS : 100  
 DS : 4  
 AS : 0  
 ETDPO : 0  
 AC : 1.0000000000000000  
 SC : 0.0000  
 DR : 21.150 200.4  
 DE : 1.00 0.017  
 TE : 300.2 K  
 DMSO-D6  
 NS001 : 149.00000000  
 NS002 : 1.00000000  
 NS003 : 6.00000000 20.5  
 NS004 : 0.00000000 100.0  
 NS005 : 0.00000000 200.0  
 AQC01 : 1.00000000 1  
 AQC02 : 0.00000000 200.0

Acquisition Channels: 41 channels  
 CHAN1 : 125.76294 MHz  
 CHAN2 : 125.76294 MHz  
 CHAN3 : 125.76294 MHz  
 CHAN4 : 125.76294 MHz

Processing parameters  
 SI : 32768  
 SF : 100.6261250 MHz  
 SD : 10.000 MHz  
 SFO : 125.76294 MHz  
 HF01 : 125.76294 MHz  
 HF02 : 125.76294 MHz  
 HF03 : 125.76294 MHz  
 HF04 : 125.76294 MHz

cyclohexane-1-amino diol

Pyrazine 4a <sup>1</sup>H Spectrum:

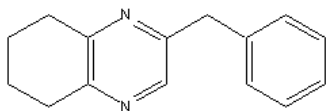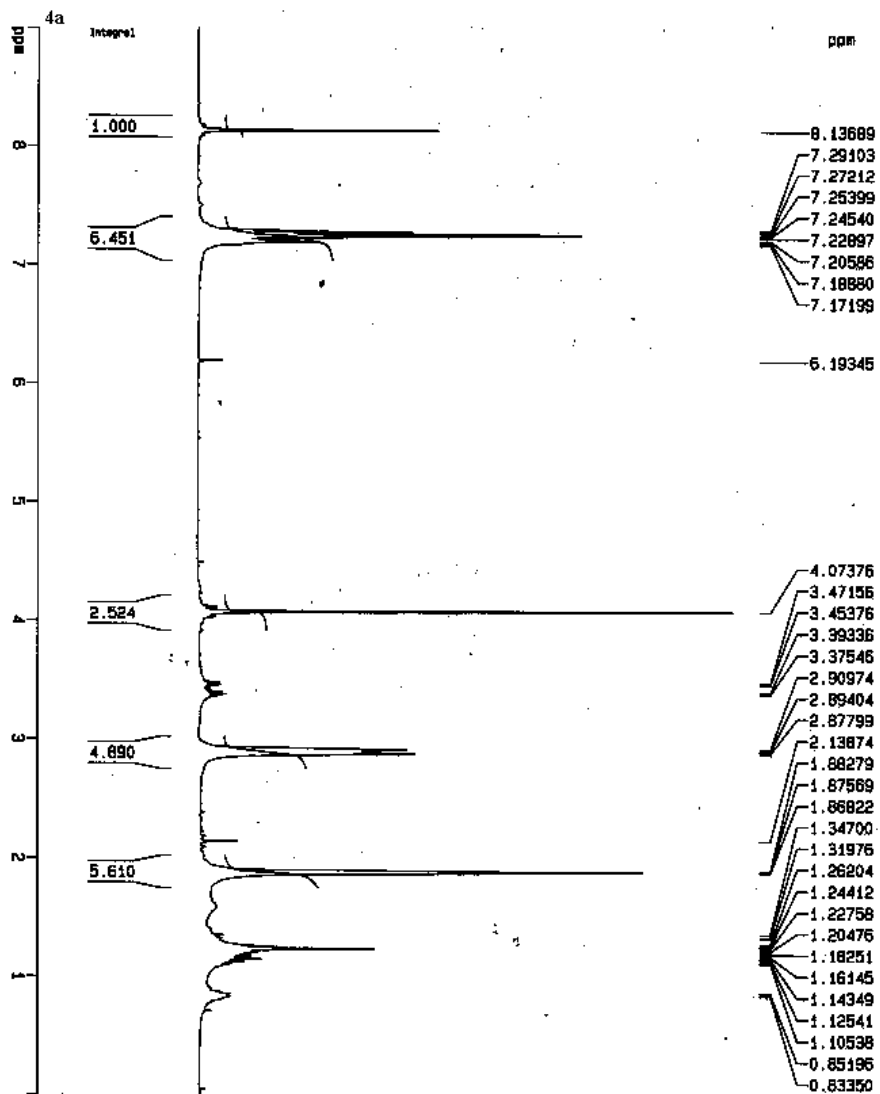

pd267

| Chemical Shift (ppm) | Integration |
|----------------------|-------------|
| 8.13689              | 1.000       |
| 7.29103              | 6.451       |
| 7.27212              |             |
| 7.25399              |             |
| 7.24540              |             |
| 7.22897              |             |
| 7.20586              |             |
| 7.18880              |             |
| 7.17199              |             |
| 6.19345              |             |
| 4.07376              | 2.524       |
| 3.47156              |             |
| 3.45376              |             |
| 3.39336              |             |
| 3.37546              |             |
| 2.90974              |             |
| 2.89404              |             |
| 2.87799              |             |
| 2.13874              | 4.890       |
| 1.88279              |             |
| 1.87569              |             |
| 1.86822              |             |
| 1.34700              | 5.610       |
| 1.31976              |             |
| 1.26204              |             |
| 1.24412              |             |
| 1.22758              |             |
| 1.20476              |             |
| 1.18251              |             |
| 1.16145              |             |
| 1.14349              |             |
| 1.12541              |             |
| 1.10538              |             |
| 0.85196              |             |
| 0.83350              |             |

Pyrazine 4a <sup>13</sup>C Spectrum:



4a

150  
140  
130  
120  
110  
100  
90  
80  
70  
60  
50  
40  
30  
20  
ppm

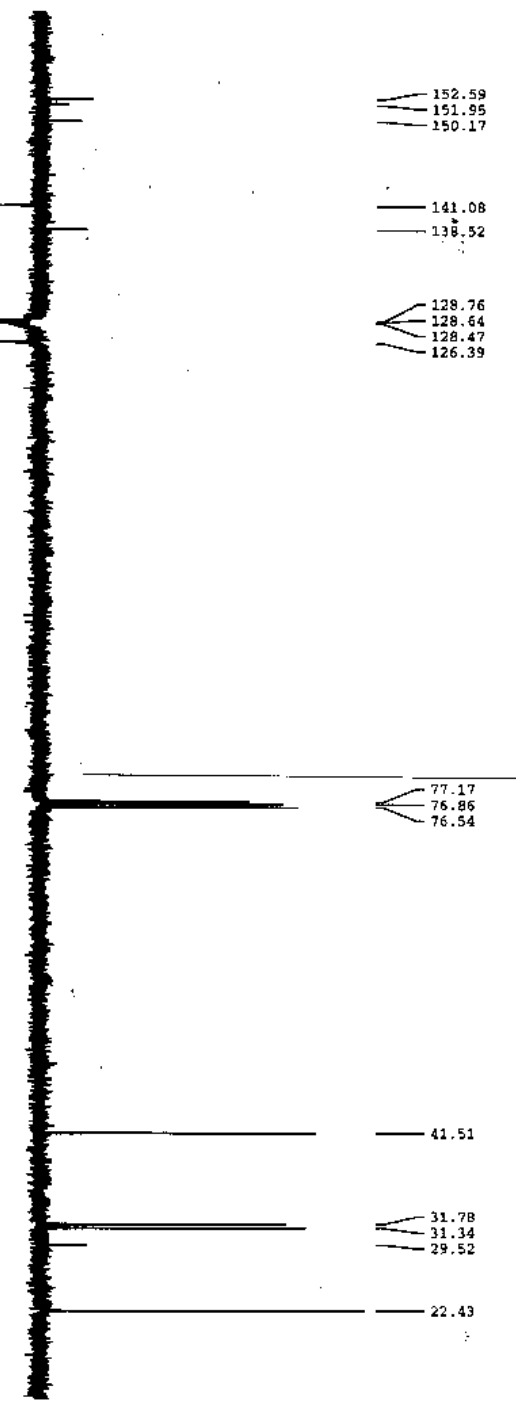

pd225jv after column  
C13APT CDC13 /opt/topspin pdm 50

Pyrazine 4b <sup>1</sup>H Spectrum:

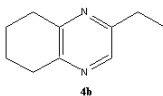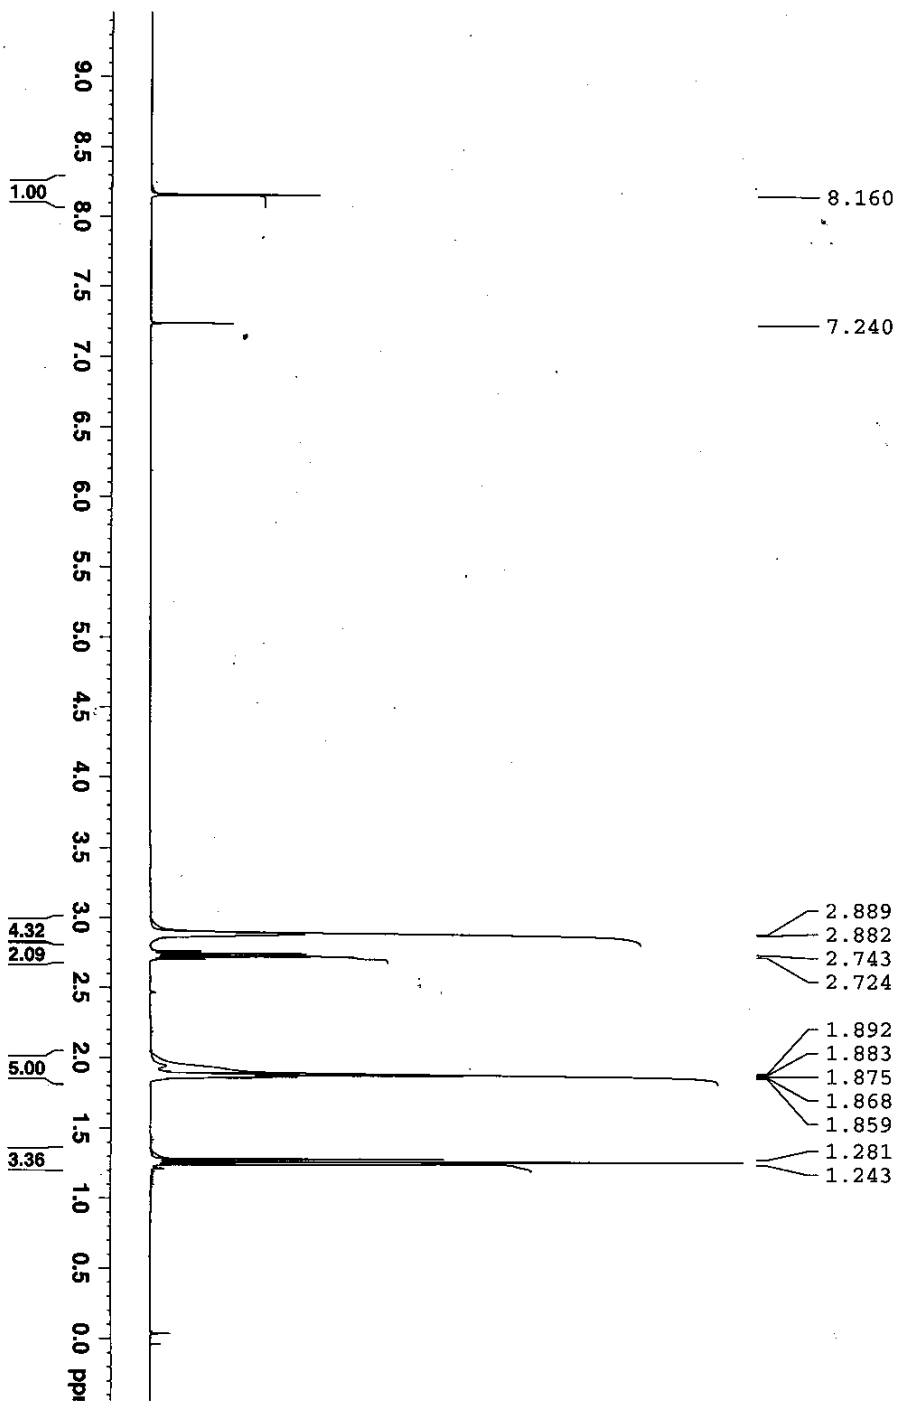

pd237  
PROTON CDCl3 /opt/topspin pdm 55

Pyrazine 4b <sup>13</sup>C Spectrum:

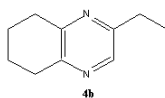

150  
140  
130  
120  
110  
100  
90  
80  
70  
60  
50  
40  
30  
20  
10  
ppm

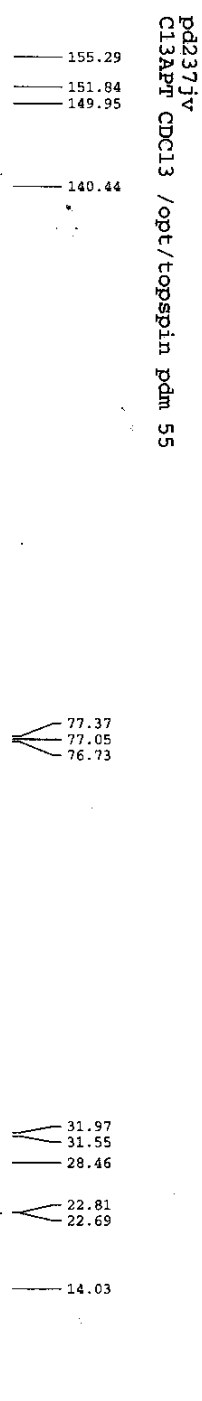

Pyrazine 4c <sup>1</sup>H Spectrum:

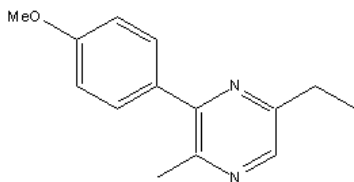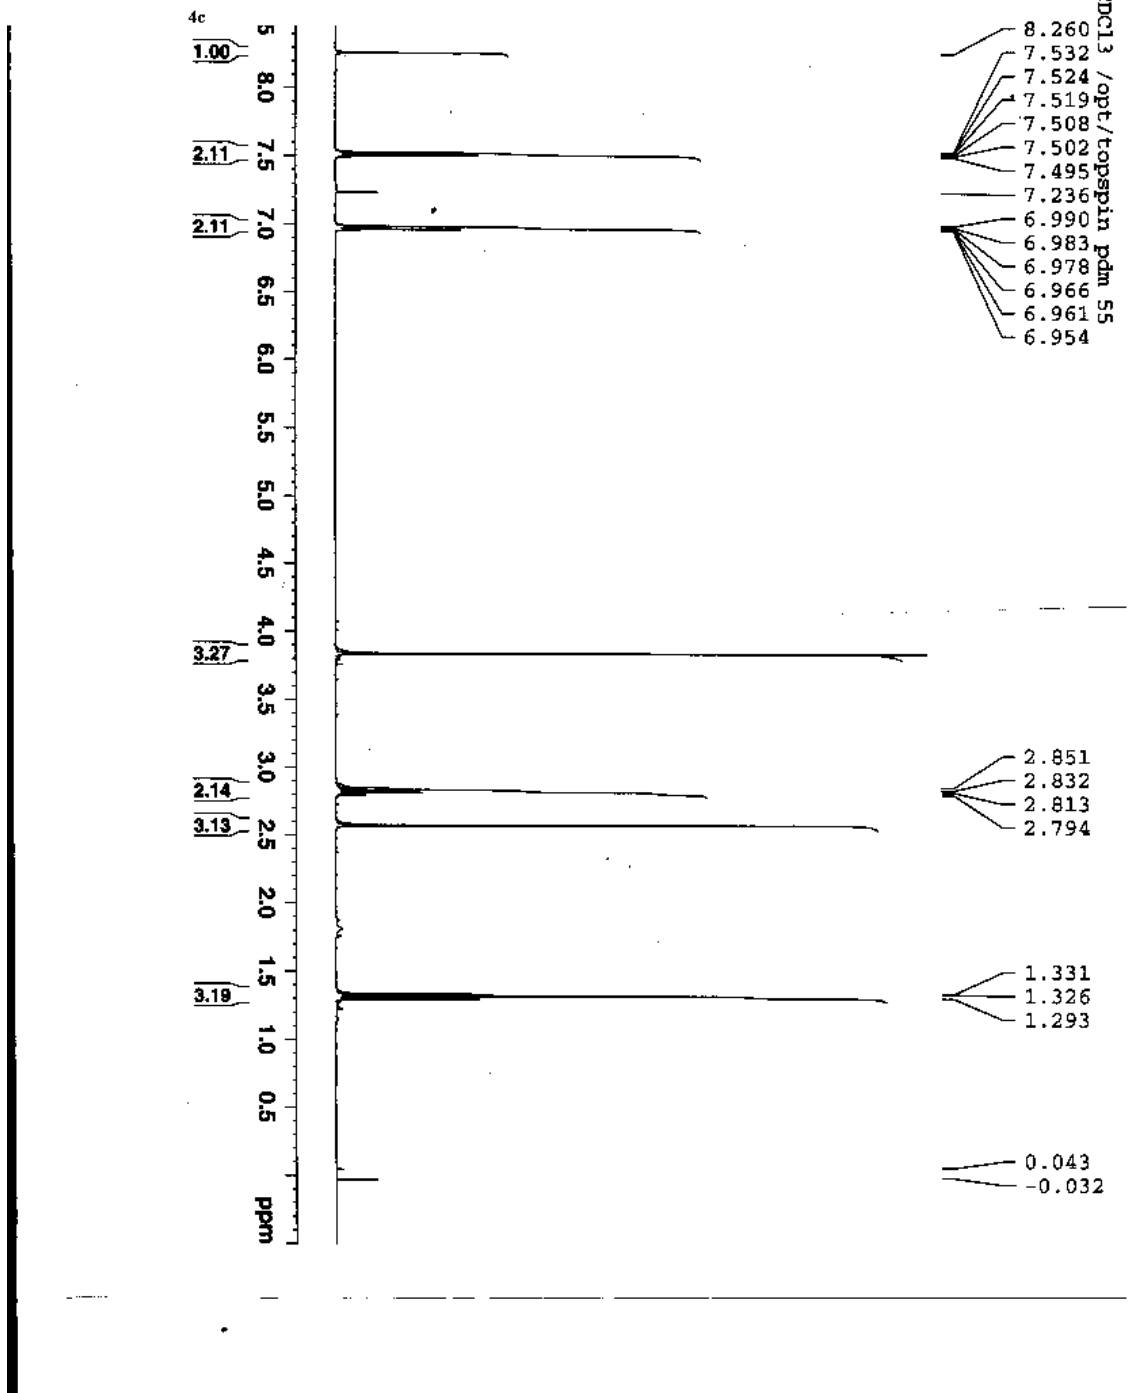

Pyrazine 4c <sup>13</sup>C Spectrum:

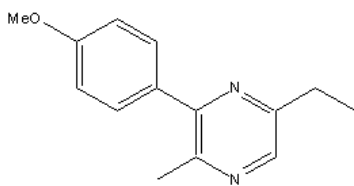

<sup>13</sup>C NMR spectrum showing chemical shifts in ppm (150 to 10) on the x-axis.

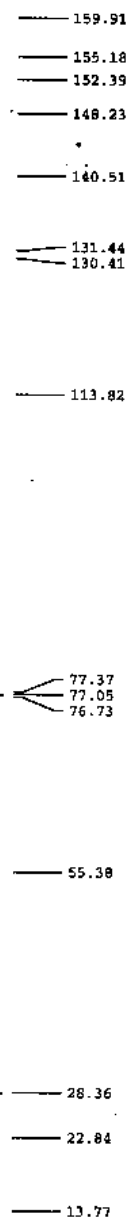

pd249jv  
C13APT CDCl3 /opt/cogspin pdm 55



Pyrazine 4d <sup>1</sup>H Spectrum:

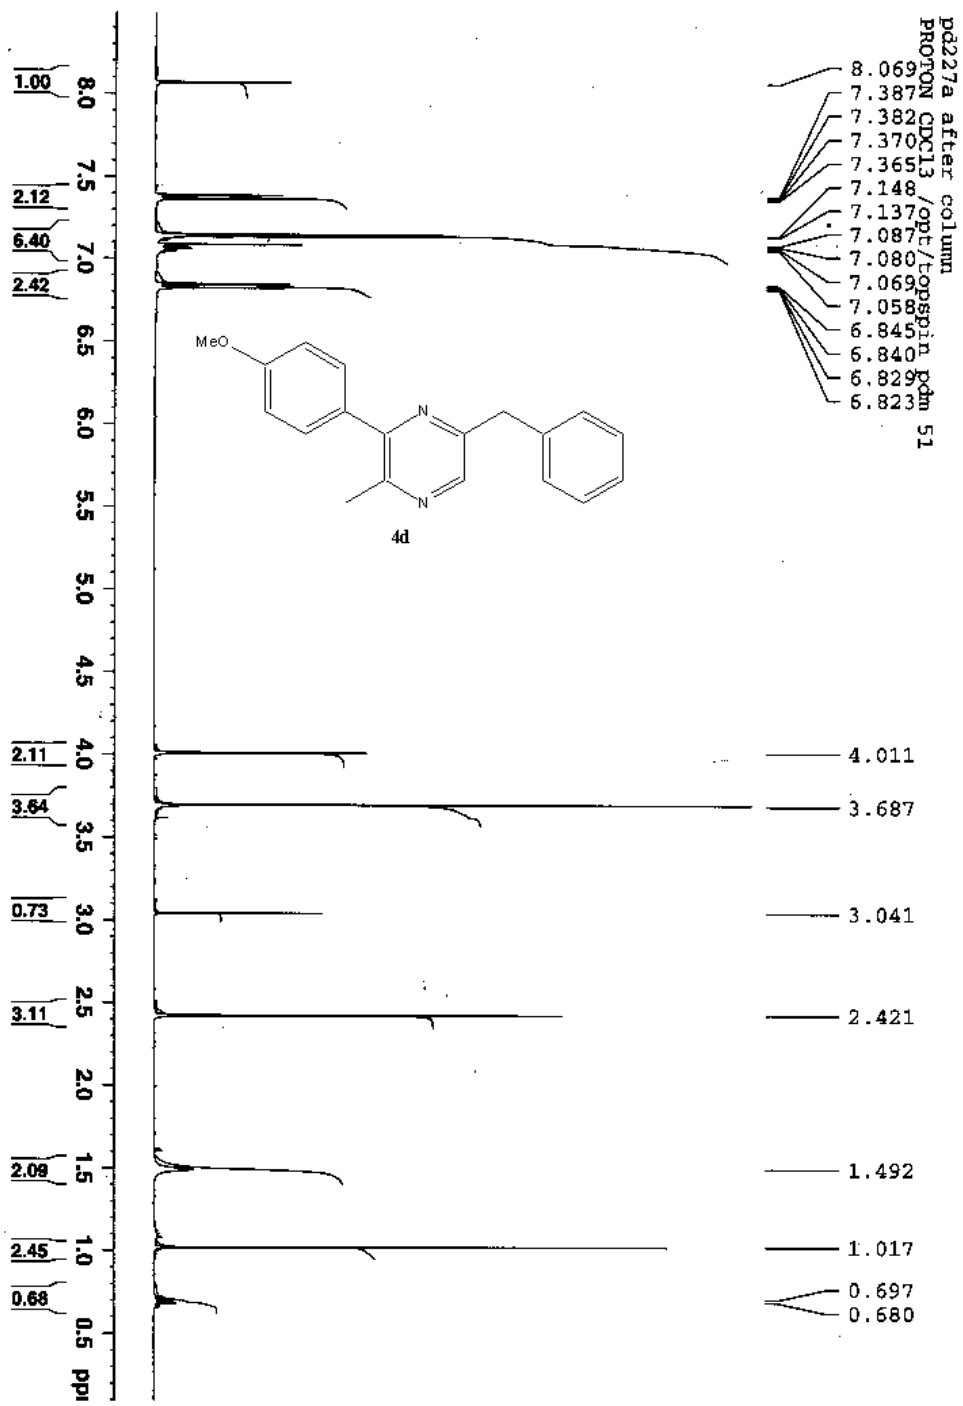

Pyrazine 4d <sup>13</sup>C Spectrum:

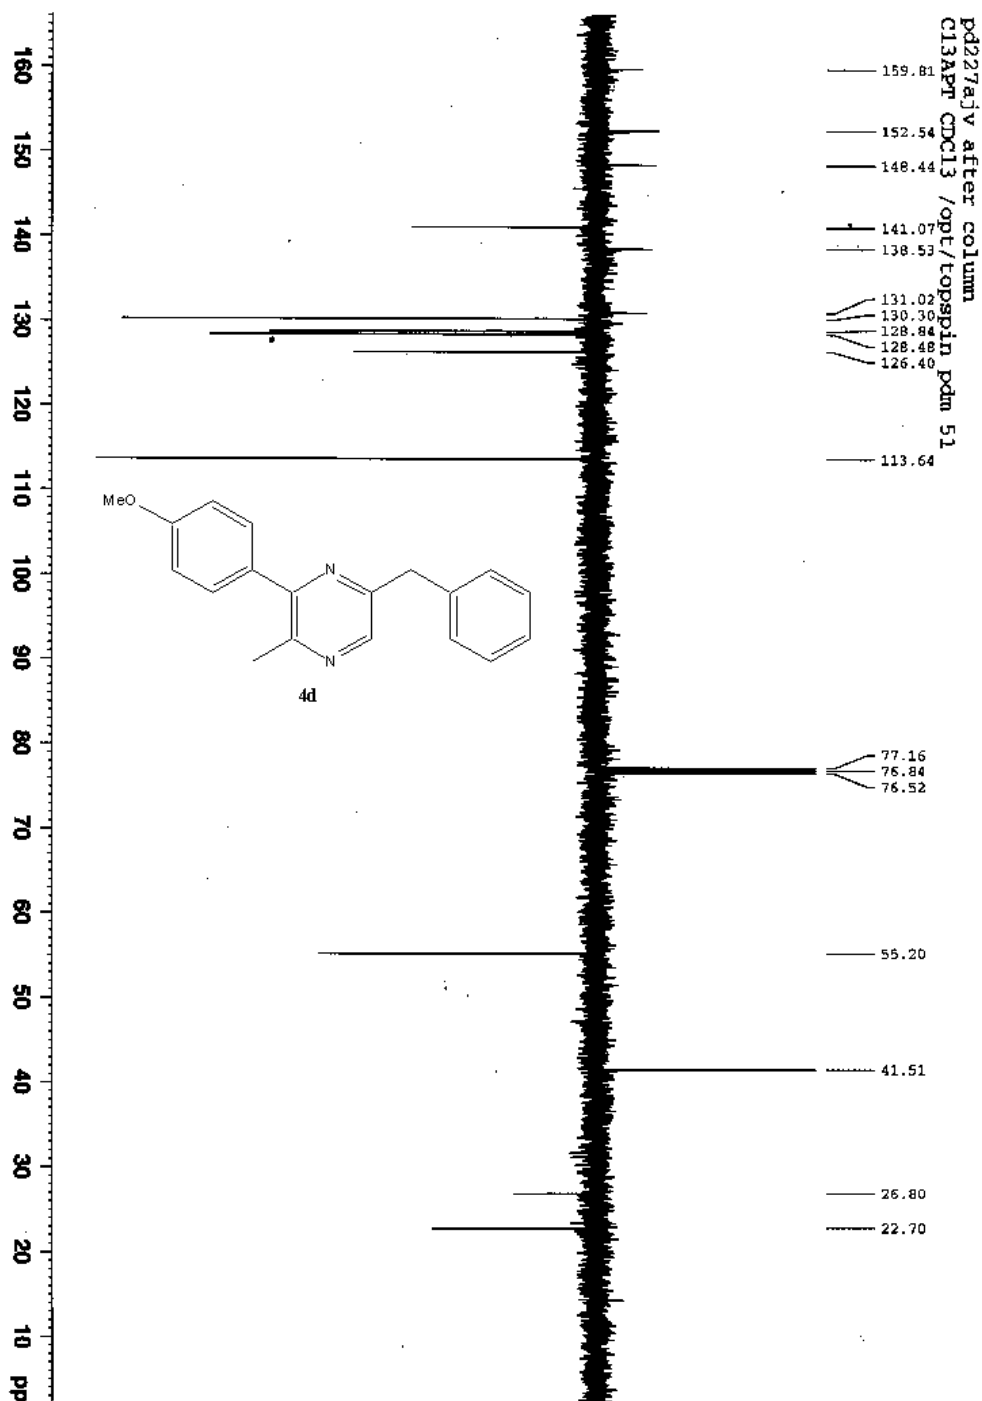

Pyrazine 4e <sup>1</sup>H Spectrum:

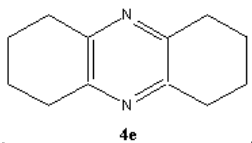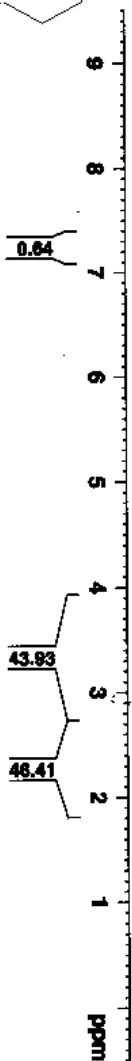

Current Data Parameters  
 NAME: pd231a  
 EXPR: 1  
 PROCNO: 1

F2 - Acquisition Parameters  
 Date\_: 20051111  
 Time: 1.58  
 INSTRUM: spect  
 PROBRD: 5 mm PABBO BB-  
 PULPROG: zg30  
 TD: 65536  
 SOLVENT: CDCl3  
 NS: 16  
 DS: 2  
 SWE: 4006.410 Hz  
 FIDRES: 0.061133 Hz  
 AQ: 8.1789427 sec  
 RG: 50.8  
 DW: 124.800 usec  
 DE: 6.00 usec  
 TE: 300.0 K  
 D1: 1.00000000 sec  
 TDO: 1

===== CHANNEL f1 =====  
 NUC1: <sup>1</sup>H  
 P1: 10.25 usec  
 PL: -2.00 dB  
 SFO1: 400.1318006 MHz

F2 - Processing parameters  
 SI: 32768  
 SF: 400.1300000 MHz  
 WDW: EM  
 SSB: 0  
 LB: 0.30 Hz  
 GB: 0  
 PC: 1.00

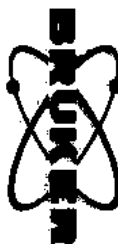

pd231a  
 PROTON CDCl3 /opt/topspin pdm 25

Pyrazine 4e <sup>13</sup>C Spectrum:

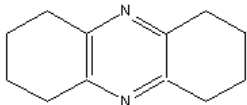

4e

200 180 160 140 120 100 80 60 40 20 0 ppm

PC 1.40

CSB 0

LB 1.00 Hz

SSB 0

WDW EM

SI 32768

SP 100.6126261 MHz

F2 - Processing parameters

SFO2 400.1315005 MHz

FIL2 16.20 dB

PCPD2 -2.00 dB

MPC2 80.00 usec

CHPRG2 waltr216

==== CHANNEL F2 =====

SFO1 100.6228298 MHz

PL1 -3.00 dB

P2 15.20 usec

F1 7.60 usec

MPC1 13C

==== CHANNEL F1 =====

TDI 1

DELTA 0.00000968 sec

d20 5.00000000 sec

d1 5.00000000 sec

CMSTR1 1.00000000

TE 300.0 K

DE 5.00 usec

TM 20.850 usec

RG 16384

AQ 1.3664756 sec

FTURES 0.365918 Hz

SRH 23980.814 Hz

NS 128

SOLVENT MeOD

TD 65836

FIDUCIOS 5

PROBHD 5 mm BBO BB-

INSTRUM spect

Flow 15.1

Date\_ 20050817

F2 - Acquisition Parameters

PROCNO 1

EXPNO 1

NAMES pkl149jvert

Current Data Parameters

1

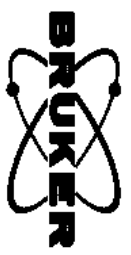

48.15  
47.93  
47.72  
47.51  
47.30  
47.08  
46.87  
30.63  
22.09

pkl149jvert  
C13APT MeOD /opt/topspin pdm 47
